# Supplementary material for: Photo-induced hydrophilicity at the ZnO(1120) surface: an evolutionary algorithm-aided density functional theory study
Source: Royal Society of Chemistry journal article supplement (doi:10.1039/d1cp02542b), 2021-01-01
Supplement: d1cp02542b1.pdf [file d1cp02542b1.pdf]

## 1 **Session 1. Computational details**

### 2 **Calculation model**

3 The ZnO(11 $\bar{2}$ 0) surface was modelled with a 4-layer p(2×2) surface cell. The bottom  
4 layer was kept fixed and all the other layers as well as the adsorbates were allowed to  
5 relax during the calculations. The vacuum between neighboring slabs was set as 15 Å  
6 along the z axis.

### 7 **DFT calculations**

8 All calculations were performed on the basis of plane-wave Density Functional  
9 Theory (DFT) method by using the Vienna ab initio simulation package (VASP) code<sup>1,2</sup>.  
10 The functionals used in the calculations were Perdew-Burke-Ernzerhof generalized  
11 gradient approximations (GGA-PBE) and strongly constrained and appropriately  
12 normed semilocal density functional (meta-GGA SCAN)<sup>3-5</sup>. The core-electron  
13 interactions were represented by the project-augmented wave method (PAW<sup>6,7</sup> at a  
14 kinetic energy cutoff of 400 eV with Zn (3d, 4s), O (2s, 2p) and H (1s) electrons being  
15 treated as valance states. For structure optimization, the ionic positions were allowed  
16 to relax until the forces were less than 0.05 eV·Å<sup>-1</sup>. The Monkhorst-Pack k-point grids  
17 were set as 2 × 2 × 1 for all surface cells. The Bader charge and charge difference  
18 analyses were used in our work and calculated by SCAN functional.

19 In this work, the adsorption energy ( $E_{ads}$ ) was calculated as:  $E_{ads} = E_{total} -$   
20  $(E_{opt}^{ZnO} + xE_{opt}^{H_2O})$ , where  $E_{total}$ ,  $E_{opt}^{ZnO}$  and  $E_{opt}^{H_2O}$  are the total energy of H<sub>2</sub>O/ZnO, and  
21 the calculated energies of the optimized (non-interacting) ZnO surface and H<sub>2</sub>O  
22 molecule, respectively, and  $x$  is the number of adsorbed H<sub>2</sub>O. The average adsorption

1 energy ( $E_{ads\_adv}$ ) can be obtained as follows:  $E_{ads\_adv} = E_{ads}/\chi$ . Therefore, negative  
2  $E_{ads}$  and  $E_{ads\_adv}$  indicate that the adsorption process is exothermic, and the more  
3 negative, the stronger the adsorption is.

#### 4 **USPEX calculation**

5 The evolutionary algorithm based USPEX (Universal Structure Predictor:  
6 Evolutionary Xtallography) package was used in this work<sup>8-10</sup>. The initial population  
7 included 10 structures with  $64 + 3x$  atoms, where  $x$  is the number of adsorbed  $H_2O$ . All  
8 subsequent generations each consisted of 10 structures produced by heredity (40%),  
9 random symmetric generator (20%), permutation (20%) and softmutation (20%).  
10 Structure relaxations and total energy calculations were done by the VASP code.

#### 11 **Photo-excited simulation**

12 To simulate the photo-excited states of  $ZnO(11\bar{2}0)$  surface and  $H_2O/ZnO$  adsorption  
13 systems, two methods were adopted in this work by fixing the total spin of the surface  
14 system only (Method I) or explicitly specifying the occupations of each spin up and  
15 down states (Method II)<sup>11-14</sup>. The calculation details are provided as follows. For  
16 Method I, the parameters  $ISPIN = 2$  and  $NUPDOWN = 2$  were used for the system  
17 where the difference between the number of spin-up and spin-down electrons was fixed  
18 to 2. For Method II, the NBANDS was set as 380, and the electronic occupancies were  
19 read from the INCAR file where the parameters  $FERWE = 289 \times 1.0$   $91 \times 0.0$  and  $FERDO$   
20  $= 287 \times 1.0$   $93 \times 0.0$ .

21

#### 22 **References**

- 1 [1] G. Kresse, and J. Hafner, *Phys. Rev. B*, 1993, **47**, 558.
- 2 [2] G. Kresse, and J. Hafner, *Phys. Rev. B*, 1994, **49**, 14251.
- 3 [3] J. W. Sun, et al, *Nat. Chem.*, 2016, **8**, 831.
- 4 [4] H. W. Peng, Z. H. Yang, J. P. Perdew, and J. W. Sun, *Phys. Rev. X*, 2016, **6**, 041005.
- 5 [5] J. W. Sun, A. Ruzsinszky, and J. P. Perdew, *Phys. Rev. Lett.*, 2015, **115**, 036402.
- 6 [6] P. E. Blochl, *Phys. Rev. B*, 1994, **50**, 17953.
- 7 [7] G. Kresse, and D. Joubert, *Phys. Rev. B*, 1999, **59**, 1758.
- 8 [8] A. O. Lyakhov, A. R. Oganov, H. T. Stokes, and Q. Zhu, *Comput. Phys. Commun.*,
- 9 2013, **184**, 1172.
- 10 [9] A. O. Lyakhov, A. R. Oganov, and M. Valle, *Comput. Phys. Commun.*, 2010, **181**,
- 11 1623.
- 12 [10] C. W. Glass, A. R. Oganov, and N. Hansen, *Comput. Phys. Commun.*, 2006, **175**,
- 13 713.
- 14 [11] C. Y. Liu, and E. Y. Li, *ACS Appl. Mater. Interfaces*, 2019, **11**, 1638.
- 15 [12] A. Sajid, J. R. Reimers, and M. J. Ford, *Phys. Rev. B*, 2018, **97**, 064101.
- 16 [13] C. Y. Liu, and E. Y. Li, *ACS Appl. Energy Mater.*, 2018, **1**, 455.
- 17 [14] P. Francis, C. Majumder, and S.V. Ghaisas, *Carbon*, 2015, **91**, 358.

18

19

20

1 **Session 2. Structures of H<sub>2</sub>O/ZnO with different adsorption configurations and**  
2 **coverages**

3 In this work, evolutionary algorithm aided DFT calculations were adopted to  
4 determine the possible structures of H<sub>2</sub>O/ZnO with different adsorption configurations  
5 and under different coverages. Moreover, two electronic exchange-correlation  
6 functionals, namely GGA-PBE and meta-GGA SCAN, were applied in the DFT  
7 calculations. In Fig. S1-6, we illustrate the relatively most stable structures of H<sub>2</sub>O/ZnO  
8 with molecular, partially and fully dissociative configurations under different coverages  
9 obtained through these functionals. By comparing the various calculated structures  
10 obtained with different methods (Fig. S1 and S4, Fig. S2 and S5, Fig. S3 and S6), one  
11 can see that they are generally quite similar. Nevertheless, since some early studies have  
12 suggested that more accurate results about H<sub>2</sub>O can be obtained by SCAN method, we  
13 still used the results from SCAN method for detailed analyses.

14 The calculated results (see Fig. 1c) suggest that molecular adsorption  
15 configurations are more favorable under lower coverages. For better understanding of  
16 the reasons, it is necessary to analyze the adsorption and dissociation processes. Taking  
17 the structures of 1/8 ML H<sub>2</sub>O/ZnO as the example (see Fig. S4a and S5a), one can see  
18 that for the adsorbed H<sub>2</sub>O molecule, there exist three O<sub>3c</sub> ( $\alpha$ ,  $\beta$  and  $\gamma$  in Fig. S4a) nearby  
19 and two of them ( $\alpha$  and  $\beta$ ) form H-bonds with the H<sub>2</sub>O. These three O<sub>3c</sub> may also  
20 accommodate the dissociated H after H<sub>2</sub>O dissociation. However, with the H leaving to  
21 site  $\alpha$  or  $\beta$ , the dissociated adsorption structures are quite unstable and return to the  
22 molecular one. For site  $\gamma$ , although the dissociative H<sub>2</sub>O adsorption structure with H at

1 this site can be obtained, the adsorption energy is much worse than that of the molecular  
2 one since the Zn-OH bond is stretched significantly by the H-bonding (see Fig. S5a).  
3 By contrast, when the water coverage rises above 1/2 ML, e.g. 5/8 ML, there would be  
4 no sufficient number of O<sub>3c</sub> to form H-bonds with every H<sub>2</sub>O, as one O<sub>3c</sub> can only  
5 accommodate one comfortable H-bond. Then, H<sub>2</sub>O dissociation may be favored since  
6 it can give rise to surface hydroxyls, the O<sub>2c</sub> of which can provide more H-bonds for  
7 the co-adsorbed H<sub>2</sub>O molecules.

8

9

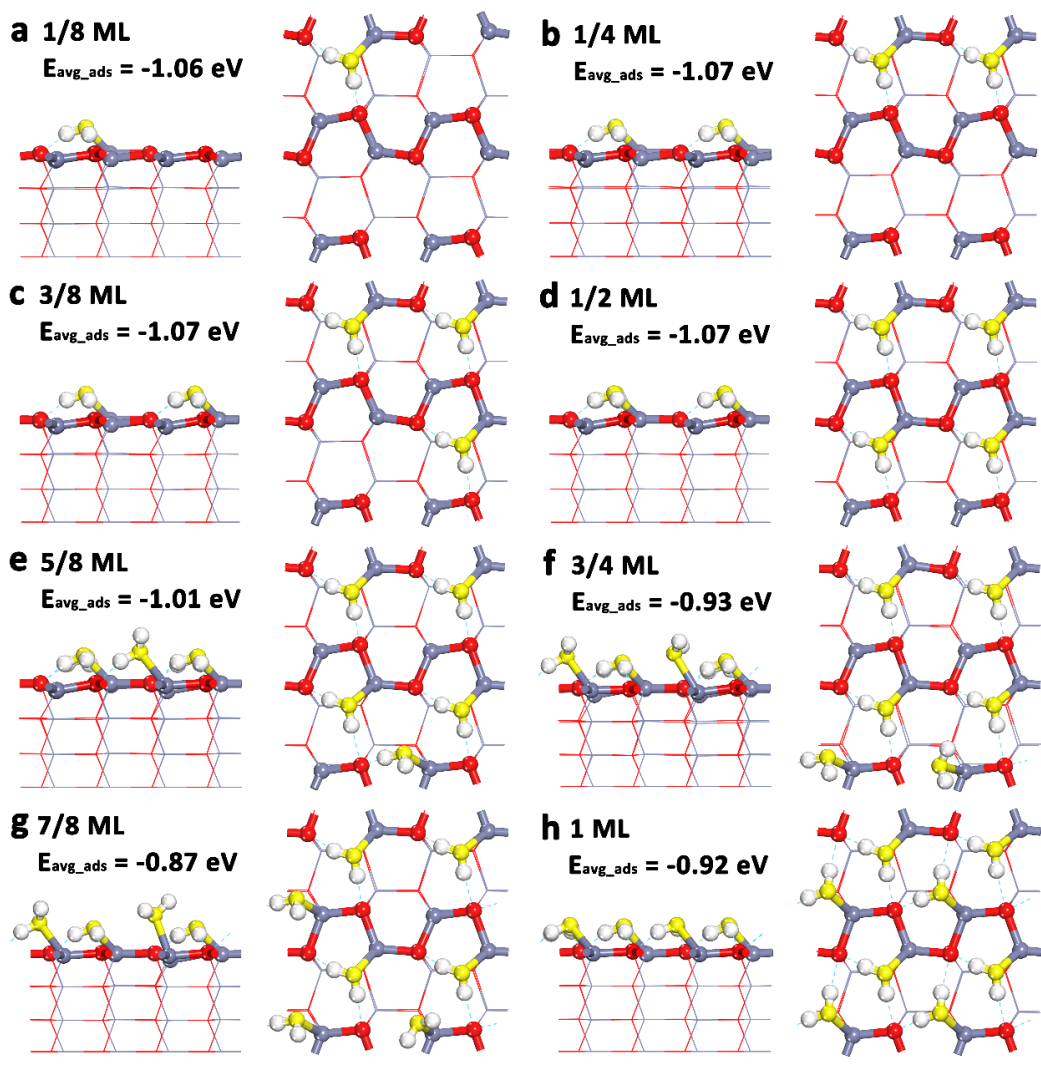

1

2 Fig. S1 (a-h) Top (right) and side (left) views of H<sub>2</sub>O/ZnO in molecular adsorption  
 3 configuration under the coverages from 1/8 to 1 ML obtained from PBE calculations.

4

5

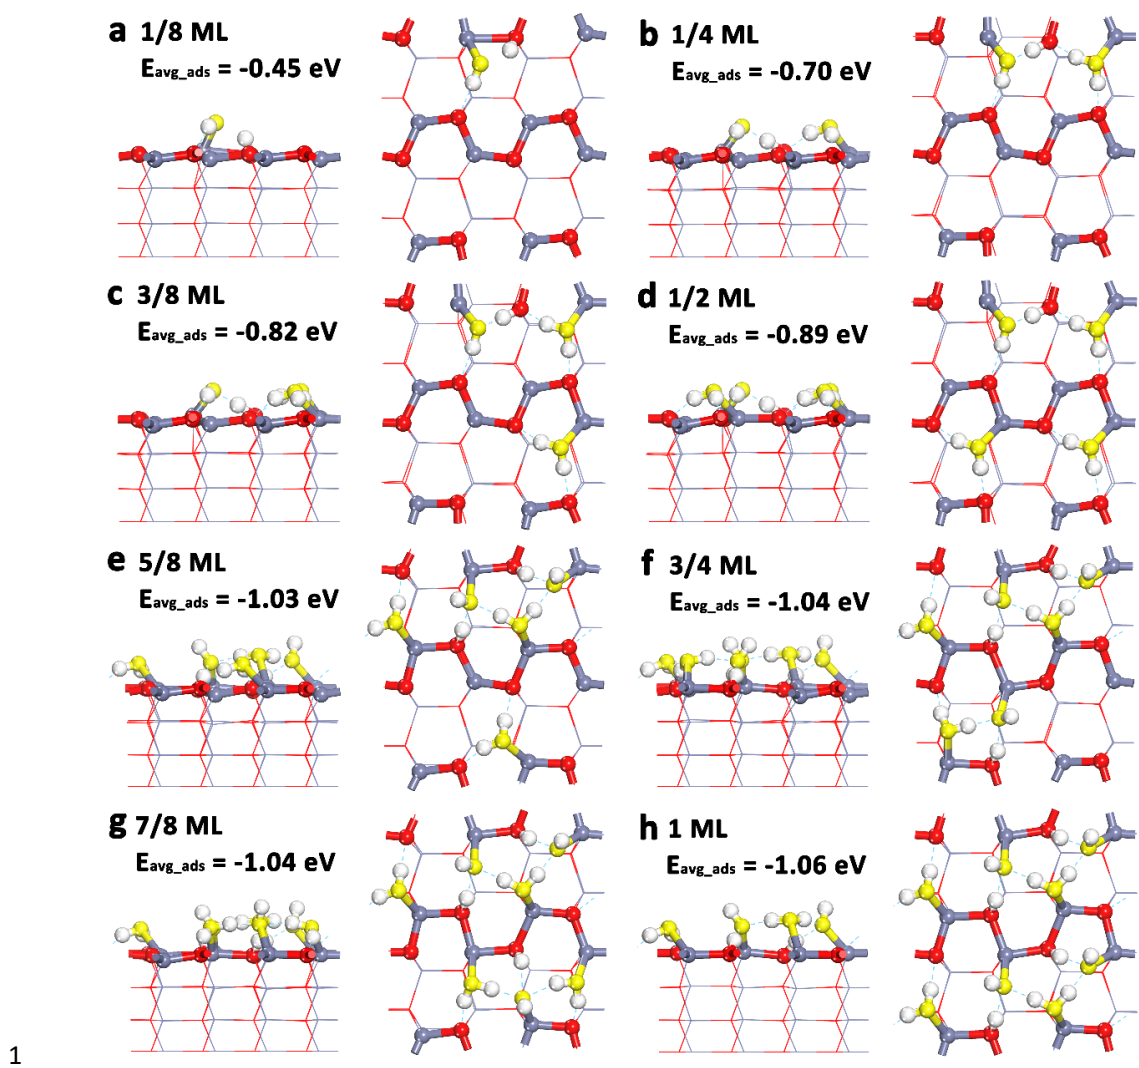

1  
2 Fig. S2 (a-h) Top (right) and side (left) views of H<sub>2</sub>O/ZnO in partially dissociative  
3 adsorption configurations under the coverages from 1/8 to 1 ML obtained from PBE  
4 calculations.

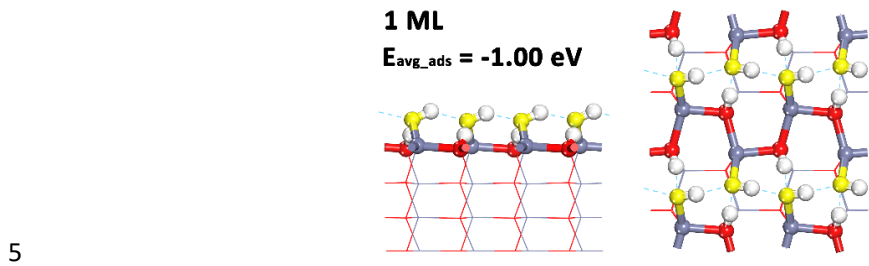

5  
6 Fig. S3 Top (right) and side (left) views of 1 ML H<sub>2</sub>O/ZnO in fully dissociative  
7 adsorption configuration obtained from PBE calculations.



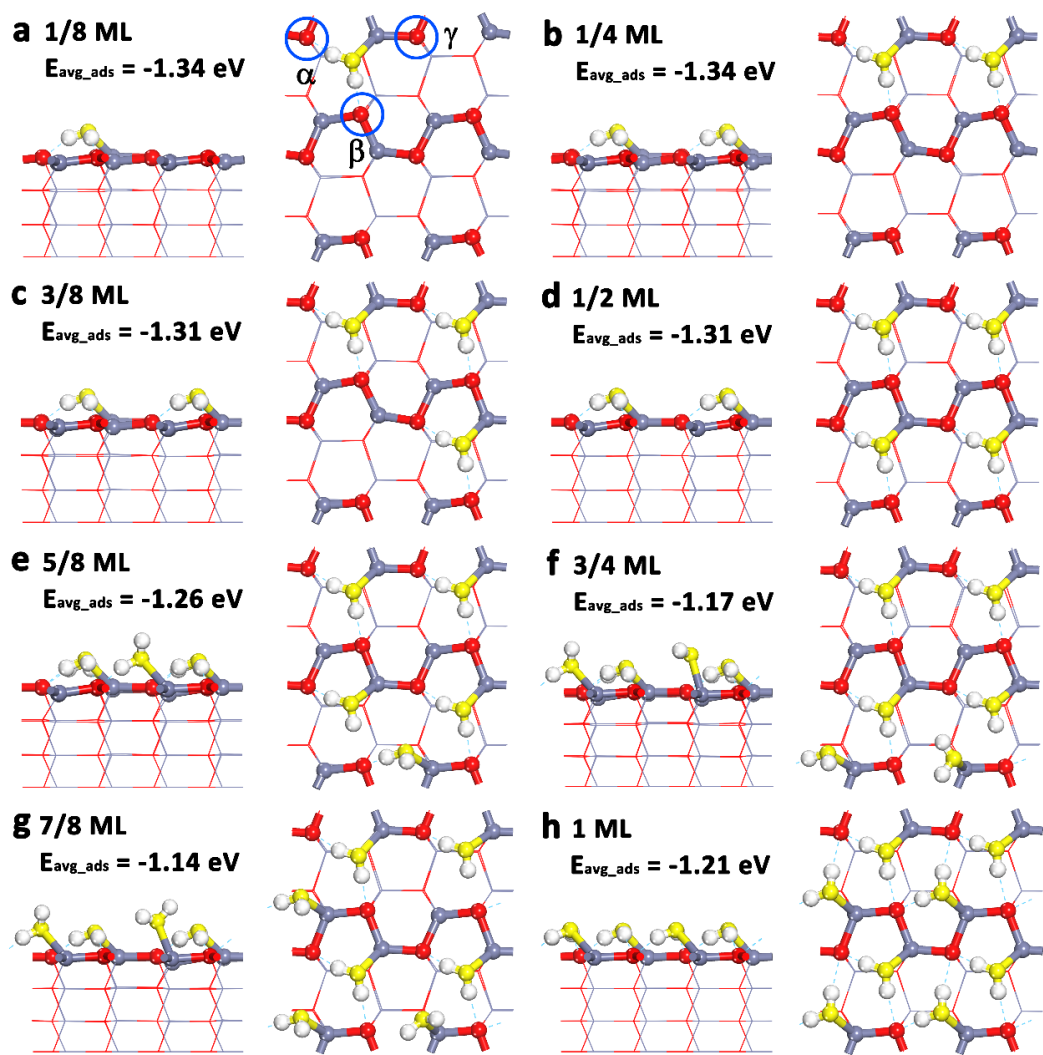

1

2 Fig. S4 (a-h) Top (right) and side (left) views of H<sub>2</sub>O/ZnO in molecular adsorption

3 configurations under the coverages from 1/8 to 1 ML obtained from SCAN calculations.

4

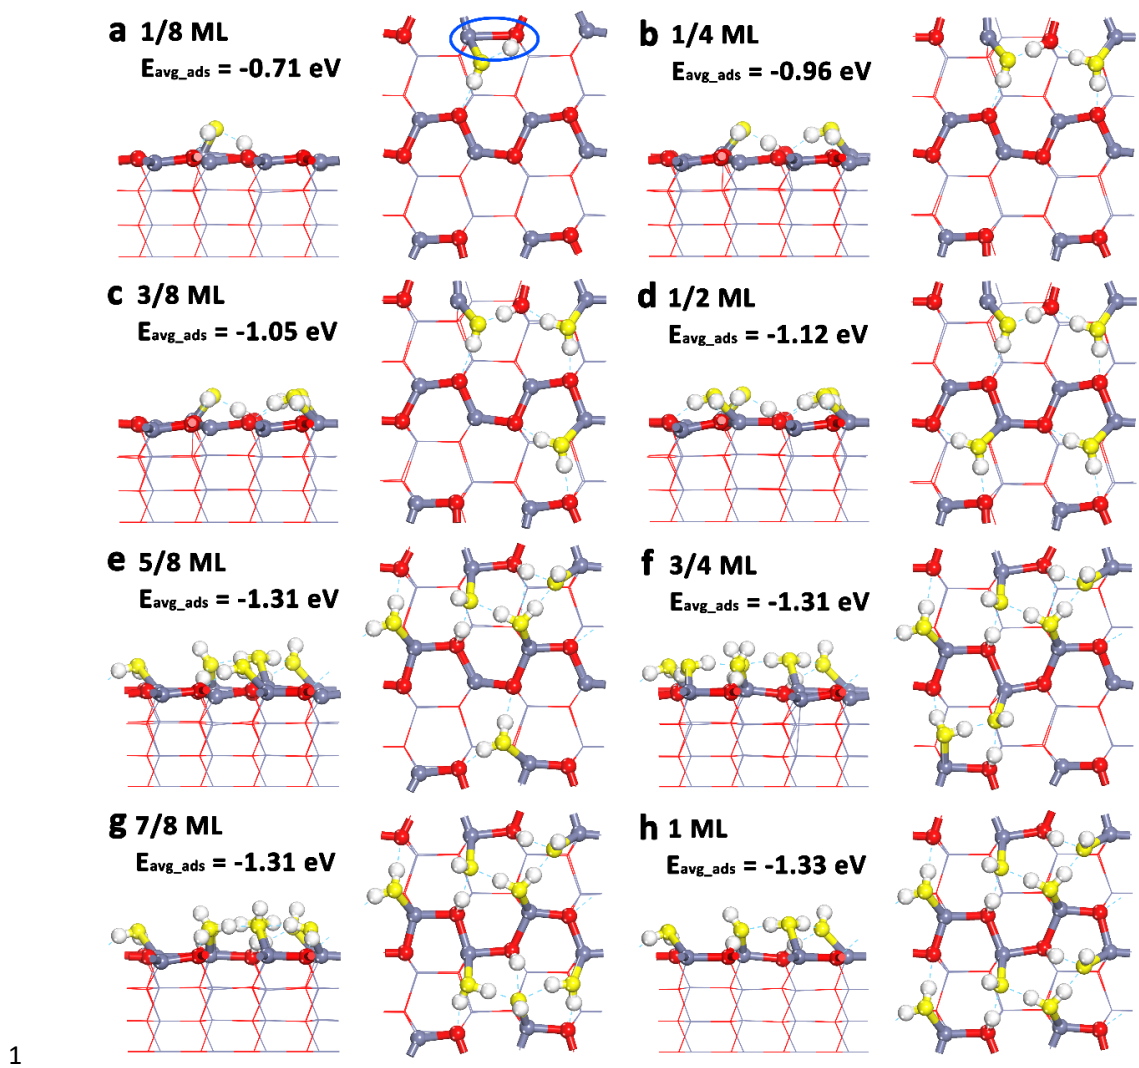

1  
 2 Fig. S5 (a-h) Top (right) and side (left) views of H<sub>2</sub>O/ZnO in partially dissociative  
 3 adsorption configurations under the coverages from 1/8 to 1 ML obtained from SCAN  
 4 calculations.

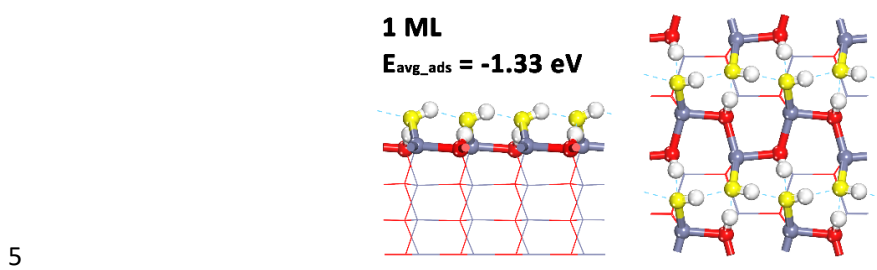

5  
 6 Fig. S6 Top (right) and side (left) views of 1 ML H<sub>2</sub>O/ZnO in fully dissociative  
 7 adsorption configuration obtained from SCAN calculations.

### 1 Session 3. Energetic and electronic analyses

2 In Fig. S7-16, we illustrate the calculated structures and energy decomposition  
3 results of H<sub>2</sub>O/ZnO under different water coverages. Fig. S17 shows the calculated  
4 average distortion energies of H<sub>2</sub>O in molecular and dissociative adsorption  
5 configurations under different coverages. In Fig. S18-20, we also calculated the  
6 electronic charge redistributions between the various H<sub>2</sub>O and the surface, between the  
7 various H<sub>2</sub>O and the rest adsorbed H<sub>2</sub>O, among the various H<sub>2</sub>O, the rest adsorbed H<sub>2</sub>O  
8 and the ZnO surface of *l-pd* H<sub>2</sub>O/ZnO. The calculation processes and results of each  
9 component are discussed as following.

10 We tentatively suggest that the total energy ( $E_{total}$ ) of the interacting H<sub>2</sub>O/ZnO  
11 system can be decomposed into altogether seven components according to the different  
12 natures of the interactions,

$$13 \quad E_{total} = E_{opt}^{ZnO} + xE_{opt}^{H_2O} + E_{distort}^{ZnO}$$
$$14 \quad + \sum_{i=1}^x (E_{distort}^{H_2O(i)} + E_{int}^{H_2O(i)/ZnO} + \frac{1}{2}E_{int}^{H_2O(i)/H_2O(x-i)} + \frac{1}{2}E_{int-indirect}^{H_2O(i)})$$

15 where  $x$  is the number of adsorbed H<sub>2</sub>O;  $i$  represents the interested H<sub>2</sub>O (H<sub>2</sub>O( $i$ ));  $E_{opt}^{ZnO}$   
16 and  $E_{opt}^{H_2O}$  are the calculated energies of the optimized (non-interacting) ZnO surface  
17 and H<sub>2</sub>O molecule, respectively;  $E_{distort}^{ZnO}$  and  $E_{distort}^{H_2O(i)}$  represent the distortion energies  
18 of the ZnO surface and adsorbed H<sub>2</sub>O( $i$ ) upon adsorption;  $E_{int}^{H_2O(i)/ZnO}$  and  
19  $E_{int}^{H_2O(i)/H_2O(x-i)}$  represent the direct interaction energies between H<sub>2</sub>O( $i$ ) and ZnO  
20 surface and the rest adsorbed H<sub>2</sub>O molecules, respectively; and  $E_{int-indirect}^{H_2O(i)}$  is defined  
21 as the indirect interaction energy among H<sub>2</sub>O( $i$ ), the rest H<sub>2</sub>O molecules and ZnO  
22 surface.

## 1 Distortion energies of the ZnO(11 $\bar{2}$ 0) surfaces

2 The distortion energies of the ZnO(11 $\bar{2}$ 0) surface were obtained by

$$3 E_{distort}^{ZnO} = E_{sp}^{ZnO} - E_{opt}^{ZnO}$$

4 where  $E_{sp}^{ZnO}$  is the calculated single point energy of the ZnO surface in H<sub>2</sub>O/ZnO;  $E_{opt}^{ZnO}$   
5 is the calculated energy of the optimized (non-interacting) ZnO surface.

6

## 7 Distortion energies of H<sub>2</sub>O

8 Similar to  $E_{distort}^{ZnO}$ , the distortion energies of H<sub>2</sub>O molecules can be calculated as,

$$9 E_{distort}^{H_2O(i)} = E_{sp}^{H_2O(i)} - E_{opt}^{H_2O}$$

10 where  $E_{sp}^{H_2O(i)}$  is the calculated single point energy of the interested H<sub>2</sub>O in the  
11 adsorption state;  $E_{opt}^{H_2O}$  is the calculated energy of the optimized (non-interacting) H<sub>2</sub>O.

12 As shown in Fig. S17,  $E_{distort}^{H_2O(i)}$  is only relied on the adsorption configuration. For the  
13 adsorbed molecular H<sub>2</sub>O,  $E_{distort}^{H_2O(i)}$  were calculated to be ~0.08 eV, and much larger  
14 energies (above 3.00 eV) were obtained for the dissociated ones.

15

## 16 Interaction energies between H<sub>2</sub>O(*i*) and ZnO surface

17 The interaction energies between H<sub>2</sub>O(*i*) and ZnO surface ( $E_{int}^{H_2O(i)/ZnO}$ ) largely  
18 depend on the chemical bonds and H-bonds, and can be calculated as,

$$19 E_{int}^{H_2O(i)/ZnO} = E_{sp}^{H_2O(i)/ZnO} - E_{sp}^{H_2O(i)} - E_{sp}^{ZnO}$$

20 where  $E_{sp}^{H_2O(i)/ZnO}$ ,  $E_{sp}^{H_2O(i)}$  and  $E_{sp}^{ZnO}$  are the calculated single point energies of the  
21 ZnO surface containing H<sub>2</sub>O(*i*), interested H<sub>2</sub>O and ZnO surface in H<sub>2</sub>O/ZnO.

22 Similarly, the electron redistribution (Fig. S18) between H<sub>2</sub>O(*i*) and ZnO surface

1 ( $D_{int}^{H_2O(i)/ZnO}$ ) in *l-pd* H<sub>2</sub>O/ZnO can be calculated as,

$$2 \quad D_{int}^{H_2O(i)/ZnO} = D^{H_2O(i)/ZnO} - D^{H_2O(i)} - D^{ZnO}$$

3 where  $D^{H_2O(i)/ZnO}$ ,  $D^{H_2O(i)}$  and  $D^{ZnO}$  are the electron distribution of the ZnO surface  
4 containing H<sub>2</sub>O(*i*), interested H<sub>2</sub>O and ZnO surface in *l-pd* H<sub>2</sub>O/ZnO.

5 For most H<sub>2</sub>O in molecular adsorption configuration, one O<sub>H<sub>2</sub>O</sub>-Zn<sub>3c</sub> bond and  
6 two H-bonds are formed between these H<sub>2</sub>O molecules and the ZnO surface, and  
7  $E_{int}^{H_2O(i)/ZnO}$  were calculated to be  $\sim -1.55$  eV. While the  $E_{int}^{H_2O(i)/ZnO}$  of H<sub>2</sub>O in  
8 dissociative adsorption configuration are much larger ( $\sim 5.00$  eV), due to the stronger  
9 interaction between H<sub>2</sub>O and ZnO through O<sub>H<sub>2</sub>O</sub>-Zn<sub>3c</sub> and H<sub>H<sub>2</sub>O</sub>-O<sub>3c</sub> bonds. The same  
10 trend can be also found in the electron redistribution between H<sub>2</sub>O(*i*) and ZnO surface  
11 in *l-pd* H<sub>2</sub>O/ZnO (see in Fig. S18).

12

### 13 **Interaction energies between H<sub>2</sub>O(*i*) and the rest adsorbed H<sub>2</sub>O**

14 The interaction energies between H<sub>2</sub>O(*i*) and the rest adsorbed H<sub>2</sub>O  
15 ( $E_{int}^{H_2O(i)/H_2O(x-i)}$ ) are mainly determined by the H-bonding and electrostatic  
16 interactions in between, and can be calculated as,

$$17 \quad E_{int}^{H_2O(i)/H_2O(x-i)} = E_{sp}^{H_2O(i)/H_2O(x-i)} - E_{sp}^{H_2O(i)} - E_{sp}^{H_2O(x-i)}$$

18 where  $E_{sp}^{H_2O(i)/H_2O(x-i)}$ ,  $E_{sp}^{H_2O(i)}$  and  $E_{sp}^{H_2O(x-i)}$  are the calculated single point energies  
19 of the adsorbed H<sub>2</sub>O layer, the interested H<sub>2</sub>O and the rest adsorbed H<sub>2</sub>O, respectively.

20 The electron redistribution (Fig. S19) between H<sub>2</sub>O(*i*) and the rest adsorbed H<sub>2</sub>O  
21 ( $D_{int}^{H_2O(i)/H_2O(x-i)}$ ) in *l-pd* H<sub>2</sub>O/ZnO can be calculated as,

$$22 \quad D_{int}^{H_2O(i)/H_2O(x-i)} = D^{H_2O(i)/H_2O(x-i)} - D^{H_2O(i)} - D^{H_2O(x-i)}$$

1 where  $D^{H_2O(i)/H_2O(x-i)}$ ,  $D^{H_2O(i)}$  and  $D^{H_2O(x-i)}$  are the electron distribution of the  
 2 adsorbed H<sub>2</sub>O layer, the interested H<sub>2</sub>O and the rest adsorbed H<sub>2</sub>O.

3 According to the calculated results, under low coverages, the distances between  
 4 each H<sub>2</sub>O are too large ( $> 5 \text{ \AA}$ ) and the corresponding  $E_{int}^{H_2O(i)/H_2O(x-i)}$  can be neglected.  
 5 For the separate H<sub>2</sub>O in the 1×3 configuration of the partially dissociative adsorption  
 6 structure under 1 ML, it has no H-bond with other H<sub>2</sub>O, but there still exist weak  
 7 interactions ( $E_{int}^{H_2O(i)/H_2O(x-i)} = -0.23 \text{ eV}$ ) which can attributed to the electrostatic  
 8 interaction (see Fig. S19a and b). For the H<sub>2</sub>O molecule within the cluster of such 1×3  
 9 configuration, it connects with the rest dissociated H<sub>2</sub>O by H-bonds ( $E_{int}^{H_2O(i)/H_2O(x-i)}$   
 10 = -0.35 eV), and significant electron redistributions can be also recognized (see Fig.  
 11 S19c-h).

13 **Indirect interaction energies among H<sub>2</sub>O(*i*), the rest adsorbed H<sub>2</sub>O molecules and**  
 14 **ZnO surface**

15 Indirect interaction energy among H<sub>2</sub>O(*i*), the rest adsorbed H<sub>2</sub>O molecules and  
 16 ZnO surface ( $E_{int-indirect}^{H_2O(i)}$ ) can be generally ascribed to electron redistribution caused  
 17 by the adsorptions. It can be calculated as,

$$18 \quad E_{int-indirect}^{H_2O(i)} = E_{total} - E_{sp}^{ZnO} - E_{sp}^{H_2O(i)} - E_{sp}^{H_2O(x-i)} - E_{int}^{H_2O(i)/H_2O(x-i)}$$

$$19 \quad \quad \quad - E_{int}^{H_2O(i)/ZnO} - E_{int}^{H_2O(x-i)/ZnO}$$

20 where  $E_{total}$  is the calculated total energy of the adsorption system;  $E_{sp}^{ZnO}$ ,  $E_{sp}^{H_2O(i)}$  and  
 21  $E_{sp}^{H_2O(x-i)}$  are the calculated single point energies of ZnO surface, the interested H<sub>2</sub>O  
 22 and the rest adsorbed H<sub>2</sub>O in the adsorption state;  $E_{int}^{H_2O(i)/H_2O(x-i)}$ ,  $E_{int}^{H_2O(i)/ZnO}$  and

1  $E_{int}^{H_2O(x-i)/ZnO}$  are the interaction energies between the interested H<sub>2</sub>O and the rest  
 2 adsorbed H<sub>2</sub>O, between the interested H<sub>2</sub>O and ZnO surface and between the rest  
 3 adsorbed H<sub>2</sub>O molecules and ZnO surface, respectively.

4 The electron redistribution (Fig. S20) among H<sub>2</sub>O(*i*), the rest adsorbed H<sub>2</sub>O  
 5 molecules and ZnO surface ( $D_{int-indirect}^{H_2O(i)}$ ) in *1-pd* H<sub>2</sub>O/ZnO can be calculated as,

$$6 \quad D_{int-indirect}^{H_2O(i)} = D_{total} - D^{ZnO} - D^{H_2O(i)} - D^{H_2O(x-i)} - D_{int}^{H_2O(i)/H_2O(x-i)} \\ 7 \quad \quad \quad - D_{int}^{H_2O(i)/ZnO} - D_{int}^{H_2O(x-i)/ZnO}$$

8 where  $D_{total}$  is the electron distribution of *1-pd* H<sub>2</sub>O/ZnO;  $D^{ZnO}$ ,  $D^{H_2O(i)}$  and  
 9  $D^{H_2O(x-i)}$  are the electron distribution of ZnO surface, the interested H<sub>2</sub>O and the rest  
 10 adsorbed H<sub>2</sub>O in the adsorption state;  $D_{int}^{H_2O(i)/H_2O(x-i)}$ ,  $D_{int}^{H_2O(i)/ZnO}$  and  $D_{int}^{H_2O(x-i)/ZnO}$   
 11 are the electron redistribution between the interested H<sub>2</sub>O and the rest adsorbed H<sub>2</sub>O,  
 12 between the interested H<sub>2</sub>O and ZnO surface and between the rest adsorbed H<sub>2</sub>O  
 13 molecules and ZnO surface in *1-pd* H<sub>2</sub>O/ZnO.

14 As shown in Fig. S20a and b, rather small electronic charge redistributions of the  
 15 separate H<sub>2</sub>O in the 1×3 configuration was detected. However, for the H<sub>2</sub>O molecules  
 16 in the cluster, their electronic charge redistributions are much larger (see Fig. S20c-h),  
 17 suggesting the higher  $E_{int-indirect}^{H_2O(i)}$  (see in Fig. S15).

18

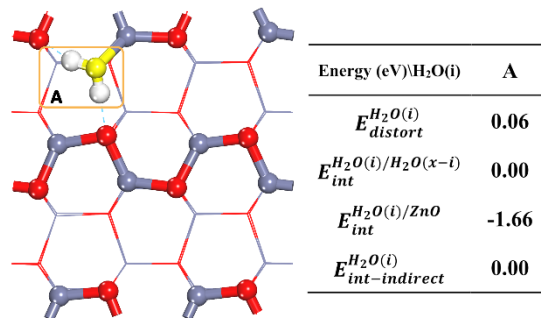

19

1 Fig. S7 Calculated structure and energy decomposition results of  $1/8$ - $m$   $\text{H}_2\text{O}/\text{ZnO}$ .

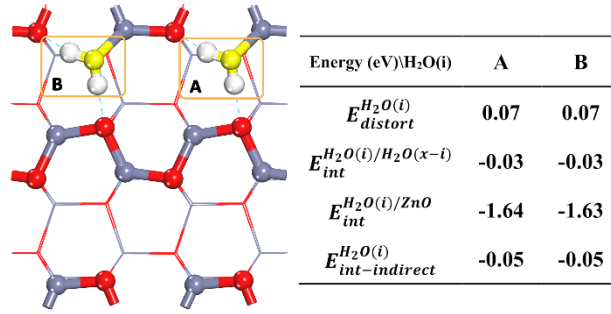

2

3 Fig. S8 Calculated structure and energy decomposition results of  $1/4$ - $m$   $\text{H}_2\text{O}/\text{ZnO}$ .

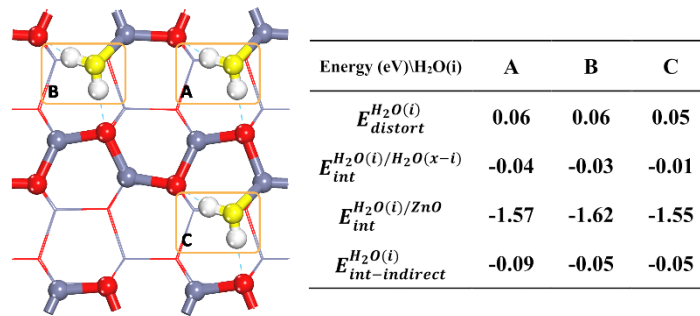

4

5 Fig. S9 Calculated structure and energy decomposition results of  $3/8$ - $m$   $\text{H}_2\text{O}/\text{ZnO}$ .

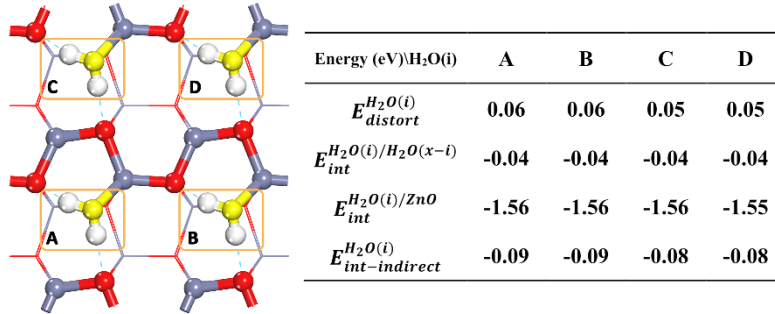

6

7 Fig. S10 Calculated structure and energy decomposition results of  $1/2$ - $m$   $\text{H}_2\text{O}/\text{ZnO}$ .

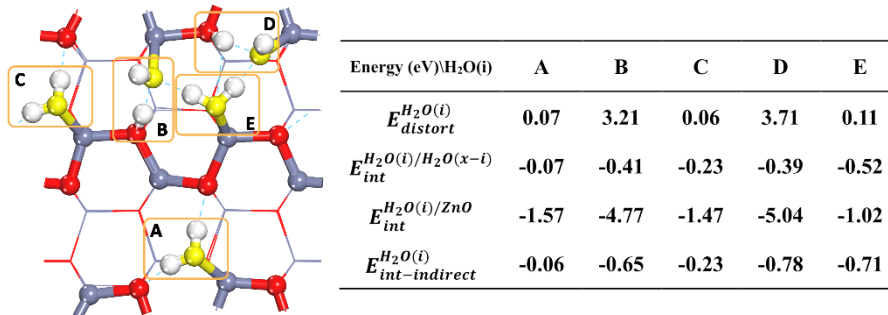

8

9 Fig. S11 Calculated structure and energy decomposition results of  $5/8$ - $pd$   $\text{H}_2\text{O}/\text{ZnO}$ .



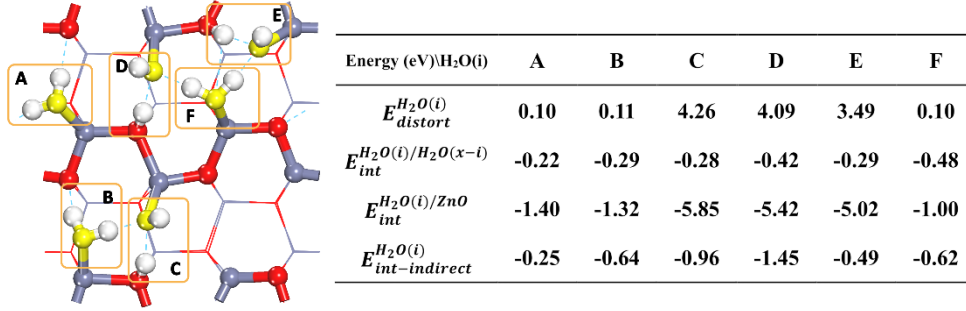

1

2 Fig. S12 Calculated structure and energy decomposition results of 3/4-pd H<sub>2</sub>O/ZnO.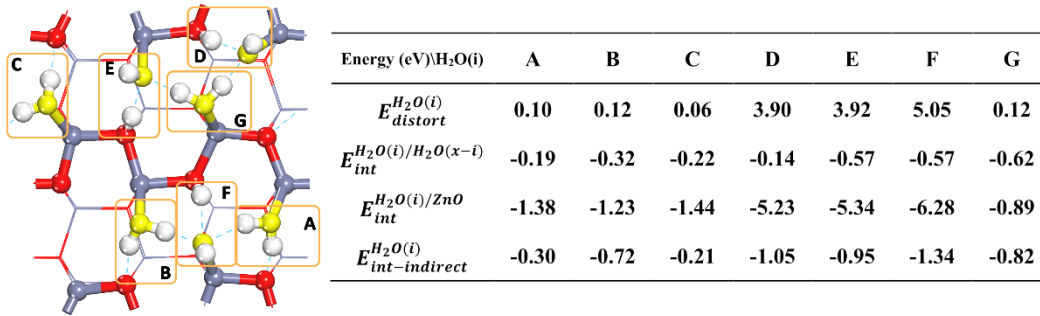

3

4 Fig. S13 Calculated structure and energy decomposition results of 7/8-pd H<sub>2</sub>O/ZnO.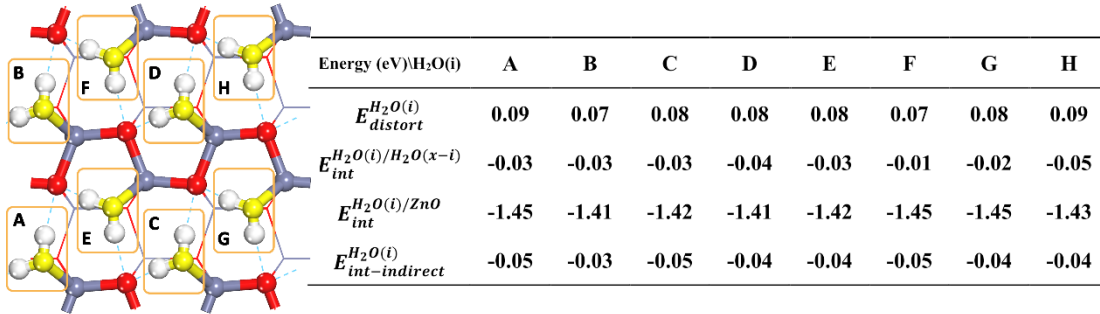

5

6 Fig. S14 Calculated structure and energy decomposition results of 1-m H<sub>2</sub>O/ZnO.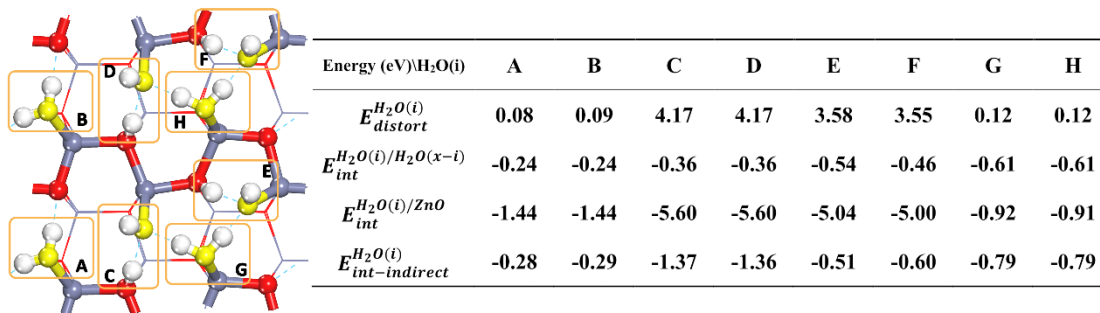

7

8 Fig. S15 Calculated structure and energy decomposition results of 1-pd H<sub>2</sub>O/ZnO.

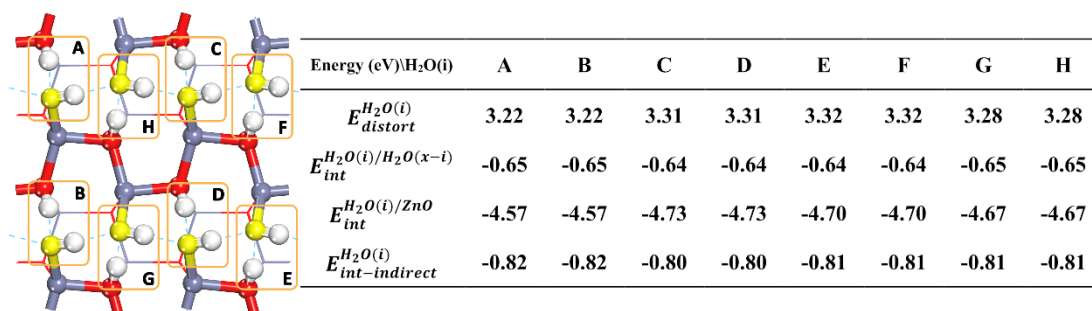

1

2 Fig. S16 Calculated structure and energy decomposition results of *I-fd* H<sub>2</sub>O/ZnO.

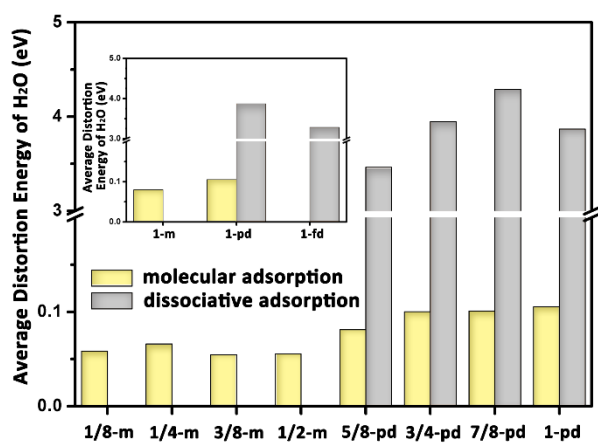

3

4 Fig. S17 Calculated average distortion energies of H<sub>2</sub>O in molecular and dissociative

5 adsorption configurations under different coverages.

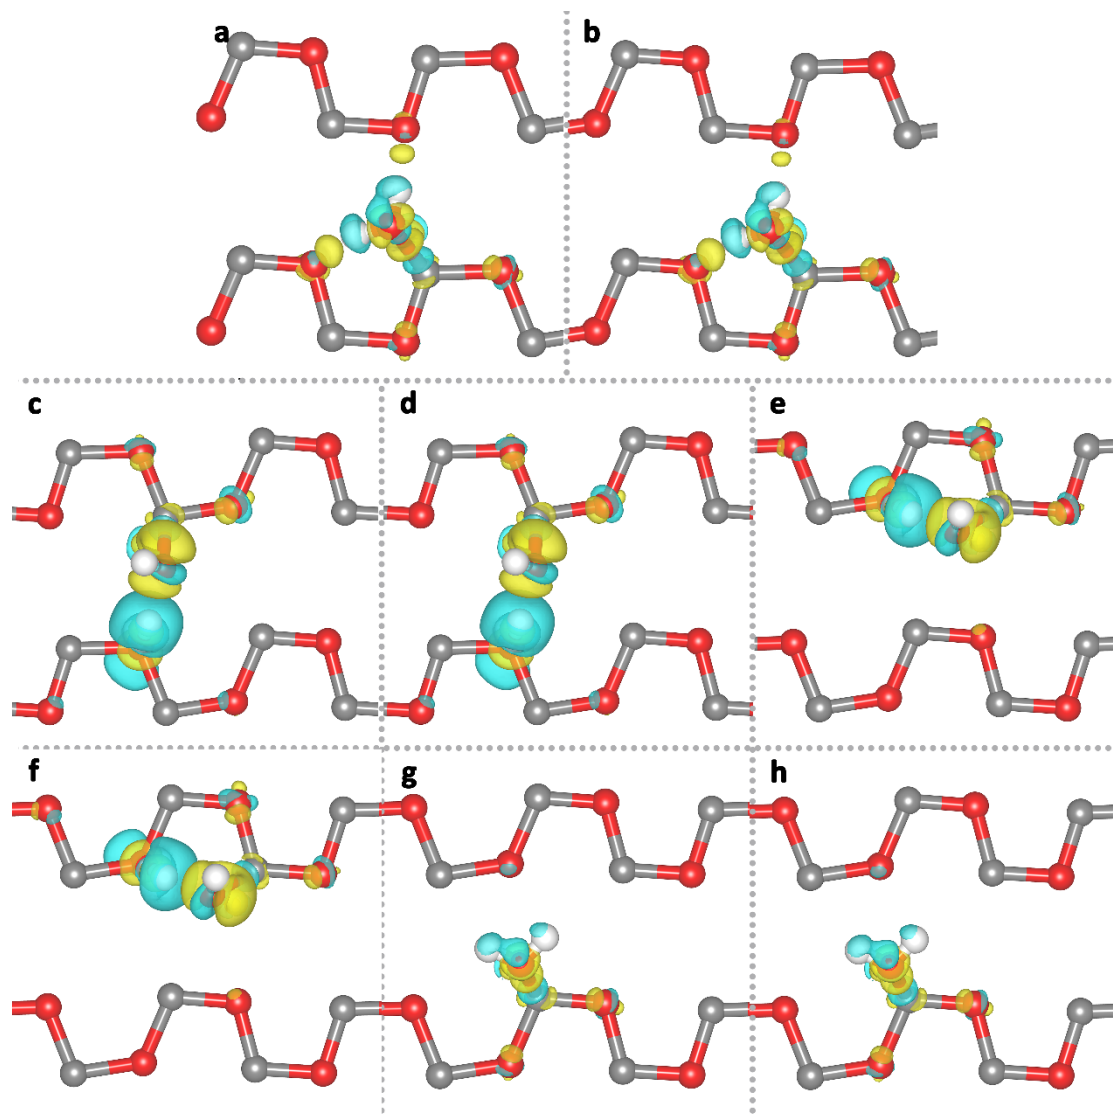

1

2 Fig. S18 Calculated electronic charge redistributions between the various H<sub>2</sub>O and the  
 3 surface in *1-pd* H<sub>2</sub>O/ZnO. (a-h) The adsorbed H<sub>2</sub>O A-H (see Fig. S15).

4

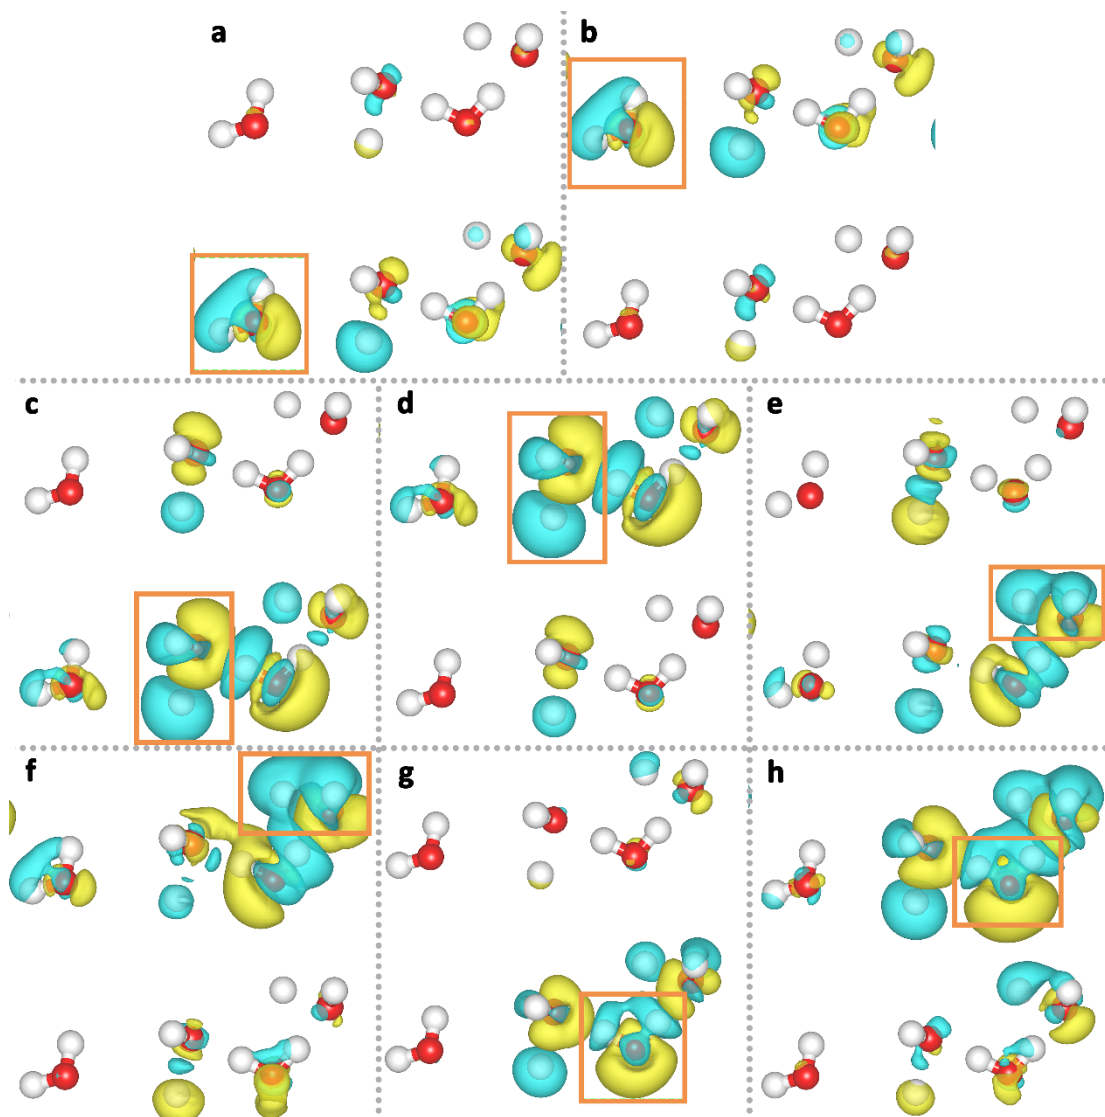

1

2 Fig. S19 Calculated electronic charge redistributions between the various H<sub>2</sub>O and the  
 3 rest adsorbed H<sub>2</sub>O of *l-pd* H<sub>2</sub>O/ZnO. (a-h) The solid rectangle in orange represents  
 4 the interested H<sub>2</sub>O A-H (see Fig. S15).

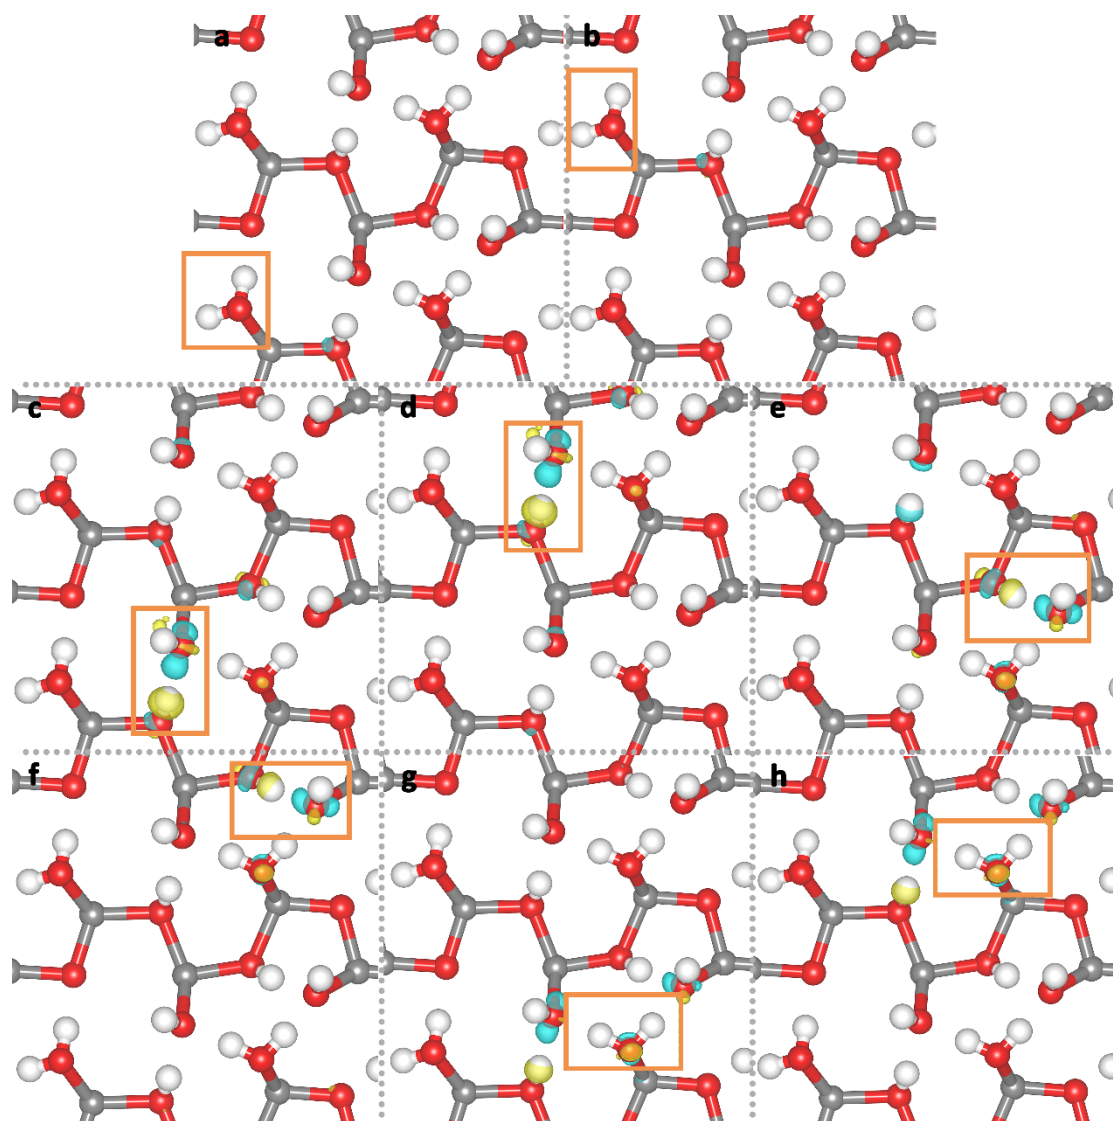

1

2 Fig. S20 Calculated electronic charge redistributions among the various H<sub>2</sub>O, the rest

3 adsorbed H<sub>2</sub>O and the ZnO surface of *1-pd* H<sub>2</sub>O/ZnO. (a-h) The solid rectangle in

4 orange represents the interested H<sub>2</sub>O A-H (see Fig. S15).

5

1 **Session 4. Calculated spin charge density and DOS after re-adjusting the location**  
2 **of one electron at the Fermi level**

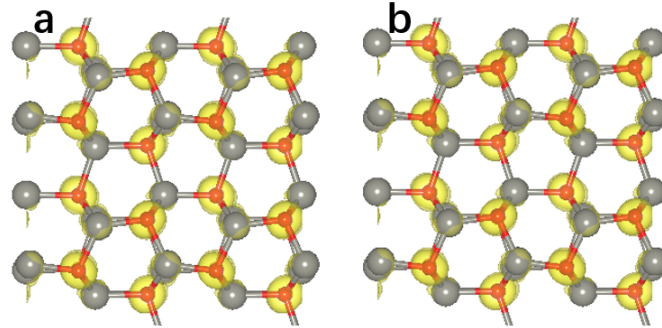

3

4 Fig. S21 Calculated spin charge density (in yellow) of the ZnO(11 $\bar{2}$ 0) at excited state  
5 by method I (a) and method II (b).

6

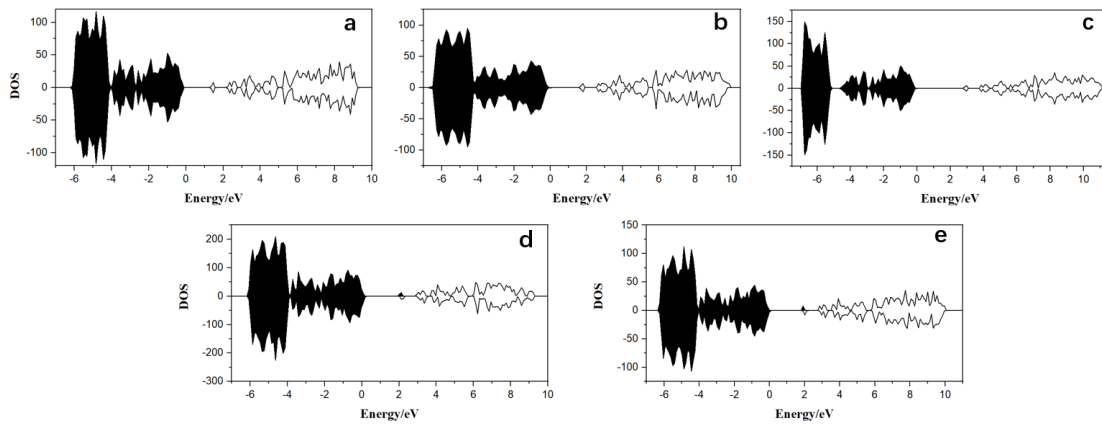

7

8 Fig. S22 Calculated DOS of the ZnO(11 $\bar{2}$ 0) surface slab at ground state by (a) PBE, (b)  
9 SCAN and (c) HSE06, and excited state simulated with (d) method I and (e) method II  
10 by SCAN. The occupied and empty states are filled in black and empty, respectively.

11

12

1 **Session 5. Calculated electronic charge redistributions after re-adjusting the**  
2 **location of one electron at the Fermi level**

3 Table SI Electronic charge redistributions within ZnO(11 $\bar{2}$ 0) of *l-m*, *l-pd* and *l-fd*  
4 H<sub>2</sub>O/ZnO after re-adjusting the location of one electron at the Fermi level by Method I  
5 and Method II.  $\Delta_{\text{electron}}$  represents the difference between electronic charges of O and  
6 Zn before and after the re-adjusting. In this table, all data were calculated by Bader  
7 charges.

|                                                   | electron amount<br>in O (e) | electron amount<br>in Zn (e) | $\Delta_{\text{electron}}$ |
|---------------------------------------------------|-----------------------------|------------------------------|----------------------------|
| optimized ZnO (original state)                    | 231.26                      | 344.74                       | /                          |
| optimized ZnO (Method I)                          | 231.18                      | 344.82                       | 0.08                       |
| optimized ZnO (Method II)                         | 231.15                      | 344.85                       | 0.11                       |
| <i>l-m</i> H <sub>2</sub> O/ZnO (original state)  | 230.82                      | 345.18                       | /                          |
| <i>l-m</i> H <sub>2</sub> O/ZnO (Method I)        | 230.46                      | 345.54                       | 0.36                       |
| <i>l-m</i> H <sub>2</sub> O/ZnO (Method II)       | 230.47                      | 345.53                       | 0.35                       |
| <i>l-pd</i> H <sub>2</sub> O/ZnO (original state) | 231.00                      | 345.00                       | /                          |
| <i>l-pd</i> H <sub>2</sub> O/ZnO (Method I)       | 230.71                      | 345.29                       | 0.29                       |
| <i>l-pd</i> H <sub>2</sub> O/ZnO (Method II)      | 230.72                      | 345.28                       | 0.28                       |
| <i>l-fd</i> H <sub>2</sub> O/ZnO (original state) | 231.00                      | 345.00                       | /                          |
| <i>l-fd</i> H <sub>2</sub> O/ZnO (Method I)       | 230.72                      | 345.28                       | 0.28                       |
| <i>l-fd</i> H <sub>2</sub> O/ZnO (Method II)      | 230.73                      | 345.27                       | 0.27                       |

8
